# Supplementary material for: Oral Administration of the Pimelic Diphenylamide HDAC Inhibitor HDACi 4b Is Unsuitable for Chronic Inhibition of HDAC Activity in the CNS In Vivo
Source: PubMed Central journal article supplement (PMC3433414; doi:10.1371/journal.pone.0044498), 2012-09-04
Supplement: pone.0044498.s002.pdf [file pone.0044498.s002.pdf]

| Cerep Assay Name                                                                         | % inhibition of control specific binding with 10 $\mu$ M 4b | % inhibition of control specific binding with 10 $\mu$ M C1 |
|------------------------------------------------------------------------------------------|-------------------------------------------------------------|-------------------------------------------------------------|
| 5-HT transporter (h) (antagonist radioligand)                                            | 5                                                           | 5                                                           |
| $\alpha$ 1 (h) (agonist radioligand)                                                     | -3                                                          | -1                                                          |
| A1 (h) (antagonist radioligand)                                                          | 7                                                           | 9                                                           |
| $\alpha$ 1 (non-selective) (antagonist radioligand)                                      | 3                                                           | 5                                                           |
| $\alpha$ 2 (h) (agonist radioligand)                                                     | 2                                                           | 2                                                           |
| $\alpha$ 2 (non-selective) (antagonist radioligand)                                      | 0                                                           | 13                                                          |
| A2A (h) (agonist radioligand)                                                            | 0                                                           | 9                                                           |
| A3 (h) (agonist radioligand)                                                             | 8                                                           | 11                                                          |
| AMPA (agonist radioligand)                                                               | -23                                                         | -29                                                         |
| AR (h) (agonist radioligand)                                                             | -2                                                          | 3                                                           |
| AT1 (h) (antagonist radioligand)                                                         | -18                                                         | -13                                                         |
| AT2 (h) (agonist radioligand)                                                            | 4                                                           | 12                                                          |
| B1 (h) (agonist radioligand)                                                             | 5                                                           | -2                                                          |
| B2 (h) (agonist radioligand)                                                             | -1                                                          | -5                                                          |
| BLT1 (LTB4) (h) (agonist radioligand)                                                    | 2                                                           | 0                                                           |
| BZD (central) (agonist radioligand)                                                      | 4                                                           | 22                                                          |
| Ca <sup>2+</sup> channel (L, dihydropyridine site) (antagonist radioligand)              | -4                                                          | -7                                                          |
| Ca <sup>2+</sup> channel (L, diltiazem site) (benzothiazepines) (antagonist radioligand) | -15                                                         | -3                                                          |
| Ca <sup>2+</sup> channel (L, verapamil site) (phenylalkylamine) (antagonist radioligand) | 7                                                           | 19                                                          |
| CB1 (h) (agonist radioligand)                                                            | 7                                                           | 18                                                          |
| CB2 (h) (agonist radioligand)                                                            | 0                                                           | 3                                                           |
| CCK1 (CCKA) (h) (agonist radioligand)                                                    | <b>72</b>                                                   | <b>68</b>                                                   |
| CCK2 (CCKB) (h) (agonist radioligand)                                                    | 0                                                           | 3                                                           |
| choline transporter (CHT1) (h) (antagonist radioligand)                                  | 14                                                          | 40                                                          |
| Cl-channel (GABA-gated) (antagonist radioligand)                                         | 0                                                           | 0                                                           |
| CRF1 (h) (agonist radioligand)                                                           | 0                                                           | -2                                                          |
| CysLT1 (LTD4) (h) (agonist radioligand)                                                  | 0                                                           | 0                                                           |
| D1 (h) (antagonist radioligand)                                                          | -10                                                         | 27                                                          |
| D2S (h) (antagonist radioligand)                                                         | 3                                                           | 2                                                           |
| D3 (h) (antagonist radioligand)                                                          | 10                                                          | 11                                                          |
| D4.4 (h) (antagonist radioligand)                                                        | 13                                                          | 31                                                          |
| dopamine transporter (h) (antagonist radioligand)                                        | 2                                                           | 23                                                          |
| EP2 (h) (agonist radioligand)                                                            | 15                                                          | 24                                                          |
| ER (non-selective) (h) (agonist radioligand)                                             | 2                                                           | 4                                                           |
| ETA (h) (agonist radioligand)                                                            | -19                                                         | 2                                                           |
| ETB (h) (agonist radioligand)                                                            | -4                                                          | -7                                                          |
| GABA (non-selective) (agonist radioligand)                                               | 14                                                          | 5                                                           |
| GABA transporter (antagonist radioligand)                                                | -12                                                         | -13                                                         |
| H1 (h) (antagonist radioligand)                                                          | 10                                                          | 45                                                          |
| H2 (h) (antagonist radioligand)                                                          | -8                                                          | -11                                                         |
| H3 (h) (agonist radioligand)                                                             | 0                                                           | 8                                                           |
| I2 (antagonist radioligand)                                                              | 5                                                           | <b>73</b>                                                   |
| IP (PGI2) (h) (agonist radioligand)                                                      | -15                                                         | -19                                                         |
| kainate (agonist radioligand)                                                            | -9                                                          | -1                                                          |
| KATP channel (antagonist radioligand)                                                    | -5                                                          | 5                                                           |
| KV channel (antagonist radioligand)                                                      | 2                                                           | 3                                                           |
| M (non-selective) (antagonist radioligand)                                               | 13                                                          | 20                                                          |
| MC4 (h) (agonist radioligand)                                                            | 1                                                           | 0                                                           |
| Na <sup>+</sup> channel (site 2) (antagonist radioligand)                                | 7                                                           | 41                                                          |
| NK1 (h) (agonist radioligand)                                                            | 7                                                           | 9                                                           |
| NK2 (h) (agonist radioligand)                                                            | 5                                                           | 9                                                           |
| NK3 (h) (antagonist radioligand)                                                         | 0                                                           | 4                                                           |
| NMDA (antagonist radioligand)                                                            | 1                                                           | -4                                                          |
| NOP (ORL1) (h) (agonist radioligand)                                                     | -2                                                          | -2                                                          |
| norepinephrine transporter (h) (antagonist radioligand)                                  | 0                                                           | 30                                                          |
| $\sigma$ (non-selective) (agonist radioligand)                                           | 26                                                          | 30                                                          |
| opioid (non-selective) (antagonist radioligand)                                          | -15                                                         | 40                                                          |
| P2X (agonist radioligand)                                                                | -3                                                          | 5                                                           |
| P2Y (agonist radioligand)                                                                | -4                                                          | -2                                                          |
| PCP (antagonist radioligand)                                                             | 15                                                          | -5                                                          |
| PPAR $\gamma$ (h) (agonist radioligand)                                                  | 13                                                          | 13                                                          |
| PR (h) (agonist radioligand)                                                             | 0                                                           | 1                                                           |
| TRH1 (h) (agonist radioligand)                                                           | 9                                                           | 1                                                           |
| V1a (h) (agonist radioligand)                                                            | 10                                                          | 11                                                          |
| V2 (h) (agonist radioligand)                                                             | 6                                                           | 5                                                           |
| Y (non-selective) (agonist radioligand)                                                  | -3                                                          | -5                                                          |
